# Supplementary material
Source: publisher figshare collection journal article supplement (https://frontiersin.figshare.com/ndownloader/files/20733783)
Supplement: Supplementary file [file 20733783]

## Context-dependent roles for SIRT2 and SIRT3 in tumor development upon calorie restriction or high fat diet

Mohamed A. Ahmed<sup>1,3</sup>, Carol O'Callaghan<sup>1</sup>, Elliot D. Chang<sup>1</sup>, Haiyan Jiang<sup>1</sup>, and Athanassios Vassilopoulos<sup>1,2</sup>

<sup>1</sup> Department of Radiation Oncology, Feinberg School of Medicine, Northwestern University, Chicago, IL, 60611, USA.

<sup>2</sup> Robert H. Lurie Comprehensive Cancer Center, Feinberg School of Medicine, Northwestern University, Chicago, IL, 60611, USA.

<sup>3</sup> Radiation Biology Department, National Center for Radiation Research and Technology, Cairo, Egypt.

### Supplementary Tables and Figures:

| Diet Group       |                   | Ctrl                        |                             |                             | CR                          |                             |                             | HFD                         |                             |                             |
|------------------|-------------------|-----------------------------|-----------------------------|-----------------------------|-----------------------------|-----------------------------|-----------------------------|-----------------------------|-----------------------------|-----------------------------|
| <i>Genotype</i>  |                   | <i>Sirt2</i> <sup>+/+</sup> | <i>Sirt2</i> <sup>-/-</sup> | <i>Sirt2</i> <sup>+/-</sup> | <i>Sirt2</i> <sup>+/+</sup> | <i>Sirt2</i> <sup>-/-</sup> | <i>Sirt2</i> <sup>+/-</sup> | <i>Sirt2</i> <sup>+/+</sup> | <i>Sirt2</i> <sup>-/-</sup> | <i>Sirt2</i> <sup>+/-</sup> |
|                  |                   | <i>Sirt3</i> <sup>+/+</sup> | <i>Sirt3</i> <sup>+/-</sup> | <i>Sirt3</i> <sup>-/-</sup> | <i>Sirt3</i> <sup>+/+</sup> | <i>Sirt3</i> <sup>+/-</sup> | <i>Sirt3</i> <sup>-/-</sup> | <i>Sirt3</i> <sup>+/+</sup> | <i>Sirt3</i> <sup>+/-</sup> | <i>Sirt3</i> <sup>-/-</sup> |
| <i>p53</i> (+/-) | Sex (M:F)         | 6:5                         | 6:5                         | 5:6                         | 5:6                         | 6:5                         | 5:6                         | 5:6                         | 5:5                         | 5:7                         |
|                  | Median age (days) | 446                         | 471                         | 413                         | 550                         | 309                         | 415                         | 293                         | 353                         | 406                         |
|                  | Hazard Ratio (HR) | -                           | -                           | -                           | 0.46                        | 1.67                        | 0.65                        | 4.01                        | 1.58                        | 1.13                        |
| <i>p53</i> (-/-) | Sex (M:F)         | 6:6                         | 6:5                         | 5:4                         | 5:7                         | 5:6                         | 5:5                         | 6:5                         | 5:6                         | 7:4                         |
|                  | Median age (days) | 179                         | 181.5                       | 169                         | 189                         | 148                         | 158                         | 139.5                       | 111                         | 112                         |
|                  | Hazard Ratio (HR) | -                           | -                           | -                           | 0.55                        | 1.16                        | 0.45                        | 1.58                        | 3.55                        | 1.24                        |

**Supplementary Table (1): Diet-induced changes in median survival and hazard ratios of tumor incidence.** The hazard ratios, indicating changes in tumor incidence rate compared to control diet group, were calculated from the slopes of tumor-free survival curves (Fig. 2-5) and estimated based on log-rank test.

| Diet | Genotype         |                    | Gender | Age (days) | Tumors observed |           |       |                                                               |         |               |       |              |
|------|------------------|--------------------|--------|------------|-----------------|-----------|-------|---------------------------------------------------------------|---------|---------------|-------|--------------|
|      | <i>p53</i>       | <i>Sirt2/3</i>     |        |            | Sarcoma         | Lymphomas | Liver | Colon/Intestinal                                              | Mammary | Head and Neck | Renal | Splenomegaly |
| CTRL | <i>p53</i> (-/-) | wt                 | Male   | 229        |                 | x         |       |                                                               |         |               |       |              |
| CTRL | <i>p53</i> (-/-) | wt                 | Male   | 162*       |                 |           |       | found dead / macroscopic analysis for tumors was not possible |         |               |       |              |
| CTRL | <i>p53</i> (-/-) | wt                 | Male   | 215        |                 |           |       |                                                               |         |               |       |              |
| CTRL | <i>p53</i> (-/-) | wt                 | Male   | 196        | x               | x         |       |                                                               |         |               |       |              |
| CTRL | <i>p53</i> (-/-) | wt                 | Male   | 108        |                 | x         |       |                                                               |         |               |       |              |
| CTRL | <i>p53</i> (-/-) | wt                 | Female | 285        | x               |           |       |                                                               |         |               |       |              |
| CTRL | <i>p53</i> (-/-) | wt                 | Female | 248        |                 | x         |       |                                                               |         |               |       |              |
| CTRL | <i>p53</i> (-/-) | wt                 | Female | 49         |                 |           |       |                                                               |         |               |       |              |
| CTRL | <i>p53</i> (-/-) | wt                 | Female | 97         |                 |           |       |                                                               |         |               |       |              |
| CTRL | <i>p53</i> (-/-) | wt                 | Female | 222        | x               |           |       |                                                               |         |               |       |              |
| CTRL | <i>p53</i> (-/-) | <i>Sirt2</i> (-/-) | Male   | 181        |                 |           |       |                                                               |         |               |       |              |
| CTRL | <i>p53</i> (-/-) | <i>Sirt2</i> (-/-) | Male   | 198        |                 |           |       | x                                                             |         |               |       |              |
| CTRL | <i>p53</i> (-/-) | <i>Sirt2</i> (-/-) | Male   | 107        |                 |           |       |                                                               |         |               |       |              |
| CTRL | <i>p53</i> (-/-) | <i>Sirt2</i> (-/-) | Male   | 220        |                 |           |       |                                                               |         |               |       |              |
| CTRL | <i>p53</i> (-/-) | <i>Sirt2</i> (-/-) | Male   | 102        |                 |           |       |                                                               |         |               |       |              |
| CTRL | <i>p53</i> (-/-) | <i>Sirt2</i> (-/-) | Male   | 182        |                 | x         |       |                                                               |         |               |       |              |
| CTRL | <i>p53</i> (-/-) | <i>Sirt2</i> (-/-) | Female | 141        |                 |           |       | x                                                             |         |               |       |              |
| CTRL | <i>p53</i> (-/-) | <i>Sirt2</i> (-/-) | Female | 186        |                 |           |       |                                                               |         |               |       |              |
| CTRL | <i>p53</i> (-/-) | <i>Sirt2</i> (-/-) | Female | 172        | x               |           |       |                                                               |         |               |       |              |
| CTRL | <i>p53</i> (-/-) | <i>Sirt2</i> (-/-) | Female | 244        |                 |           |       | x                                                             |         | x             |       |              |
| CTRL | <i>p53</i> (-/-) | <i>Sirt2</i> (-/-) | Female | 221        |                 |           |       |                                                               |         |               |       |              |
| CTRL | <i>p53</i> (-/-) | <i>Sirt3</i> (-/-) | Male   | 116        |                 |           |       |                                                               |         |               |       |              |
| CTRL | <i>p53</i> (-/-) | <i>Sirt3</i> (-/-) | Male   | 187        |                 | x         | x     |                                                               |         |               |       |              |
| CTRL | <i>p53</i> (-/-) | <i>Sirt3</i> (-/-) | Male   | 168        | x               |           |       |                                                               |         |               |       |              |
| CTRL | <i>p53</i> (-/-) | <i>Sirt3</i> (-/-) | Male   | 190        |                 |           |       |                                                               |         |               |       |              |
| CTRL | <i>p53</i> (-/-) | <i>Sirt3</i> (-/-) | Male   | 148        | x               |           |       |                                                               |         |               |       |              |
| CTRL | <i>p53</i> (-/-) | <i>Sirt3</i> (-/-) | Female | 170        |                 |           |       |                                                               |         |               |       |              |
| CTRL | <i>p53</i> (-/-) | <i>Sirt3</i> (-/-) | Female | 192        |                 |           |       |                                                               |         |               |       |              |
| CTRL | <i>p53</i> (-/-) | <i>Sirt3</i> (-/-) | Female | 196*       |                 |           |       | found dead / macroscopic analysis for tumors was not possible |         |               |       |              |
| CTRL | <i>p53</i> (-/-) | <i>Sirt3</i> (-/-) | Female | 149        |                 |           |       |                                                               | x       |               |       |              |
| CTRL | <i>p53</i> (+/-) | wt                 | Male   | 211        |                 |           |       |                                                               |         |               |       |              |
| CTRL | <i>p53</i> (+/-) | wt                 | Male   | 474        |                 |           |       |                                                               |         |               |       | x            |
| CTRL | <i>p53</i> (+/-) | wt                 | Male   | 190        |                 |           |       |                                                               |         |               |       |              |
| CTRL | <i>p53</i> (+/-) | wt                 | Male   | 518        |                 |           |       |                                                               |         |               |       | x            |
| CTRL | <i>p53</i> (+/-) | wt                 | Male   | 410*       |                 |           |       | found dead / macroscopic analysis for tumors was not possible |         |               |       |              |
| CTRL | <i>p53</i> (+/-) | wt                 | Female | 196        |                 |           |       |                                                               |         |               |       |              |
| CTRL | <i>p53</i> (+/-) | wt                 | Female | 534        |                 |           |       |                                                               |         |               |       |              |
| CTRL | <i>p53</i> (+/-) | wt                 | Female | 441*       |                 |           |       | found dead / macroscopic analysis for tumors was not possible |         |               |       |              |
| CTRL | <i>p53</i> (+/-) | wt                 | Female | 446        |                 |           |       |                                                               |         |               |       |              |
| CTRL | <i>p53</i> (+/-) | wt                 | Female | 473        |                 |           |       |                                                               |         |               |       |              |
| CTRL | <i>p53</i> (+/-) | <i>Sirt2</i> (-/-) | Male   | 186        |                 |           |       |                                                               |         |               |       |              |
| CTRL | <i>p53</i> (+/-) | <i>Sirt2</i> (-/-) | Male   | 265        |                 |           |       |                                                               |         |               |       |              |
| CTRL | <i>p53</i> (+/-) | <i>Sirt2</i> (-/-) | Male   | 570        | x               |           |       | x                                                             |         |               |       |              |
| CTRL | <i>p53</i> (+/-) | <i>Sirt2</i> (-/-) | Male   | 521        |                 | x         |       |                                                               |         |               |       |              |
| CTRL | <i>p53</i> (+/-) | <i>Sirt2</i> (-/-) | Male   | 563        |                 |           |       |                                                               |         | x             |       |              |
| CTRL | <i>p53</i> (+/-) | <i>Sirt2</i> (-/-) | Male   | 529        |                 |           |       |                                                               |         |               |       |              |
| CTRL | <i>p53</i> (+/-) | <i>Sirt2</i> (-/-) | Female | 505        |                 |           |       | x                                                             |         |               |       | x            |
| CTRL | <i>p53</i> (+/-) | <i>Sirt2</i> (-/-) | Female | 557*       |                 |           |       | found dead / macroscopic analysis for tumors was not possible |         |               |       |              |
| CTRL | <i>p53</i> (+/-) | <i>Sirt2</i> (-/-) | Female | 421        |                 |           |       |                                                               |         |               |       |              |
| CTRL | <i>p53</i> (+/-) | <i>Sirt2</i> (-/-) | Female | 301        |                 |           |       |                                                               | x       |               |       |              |
| CTRL | <i>p53</i> (+/-) | <i>Sirt2</i> (-/-) | Female | 315        |                 |           |       |                                                               |         |               |       | x            |
| CTRL | <i>p53</i> (+/-) | <i>Sirt3</i> (-/-) | Male   | 343*       |                 |           |       | found dead / macroscopic analysis for tumors was not possible |         |               |       |              |
| CTRL | <i>p53</i> (+/-) | <i>Sirt3</i> (-/-) | Male   | 471        |                 |           | x     |                                                               |         |               |       |              |
| CTRL | <i>p53</i> (+/-) | <i>Sirt3</i> (-/-) | Male   | 391        | x               |           |       |                                                               |         |               |       |              |
| CTRL | <i>p53</i> (+/-) | <i>Sirt3</i> (-/-) | Male   | 428*       |                 |           |       | found dead / macroscopic analysis for tumors was not possible |         |               |       |              |
| CTRL | <i>p53</i> (+/-) | <i>Sirt3</i> (-/-) | Male   | 448        |                 |           | x     |                                                               |         |               |       | x            |
| CTRL | <i>p53</i> (+/-) | <i>Sirt3</i> (-/-) | Female | 404*       |                 |           |       | found dead / macroscopic analysis for tumors was not possible |         |               |       |              |
| CTRL | <i>p53</i> (+/-) | <i>Sirt3</i> (-/-) | Female | 413*       |                 |           |       | found dead / macroscopic analysis for tumors was not possible |         |               |       |              |
| CTRL | <i>p53</i> (+/-) | <i>Sirt3</i> (-/-) | Female | 405        | x               |           | x     |                                                               |         |               |       |              |
| CTRL | <i>p53</i> (+/-) | <i>Sirt3</i> (-/-) | Female | 297        |                 |           |       |                                                               |         |               |       | x            |
| CTRL | <i>p53</i> (+/-) | <i>Sirt3</i> (-/-) | Female | 469        |                 |           |       |                                                               | x       |               |       | x            |
| CTRL | <i>p53</i> (+/-) | <i>Sirt3</i> (-/-) | Female | 351        |                 |           |       |                                                               |         |               | x     |              |





**Supplementary Table (2): Tumors developed in the *Sirt2<sup>wt</sup>/Sirt3<sup>wt</sup>*, *Sirt2<sup>-/-</sup>* and *Sirt3<sup>-/-</sup>* mice.** Table shows diet, genotype, gender, age and types of tumors for all mice included in the study.

**A**

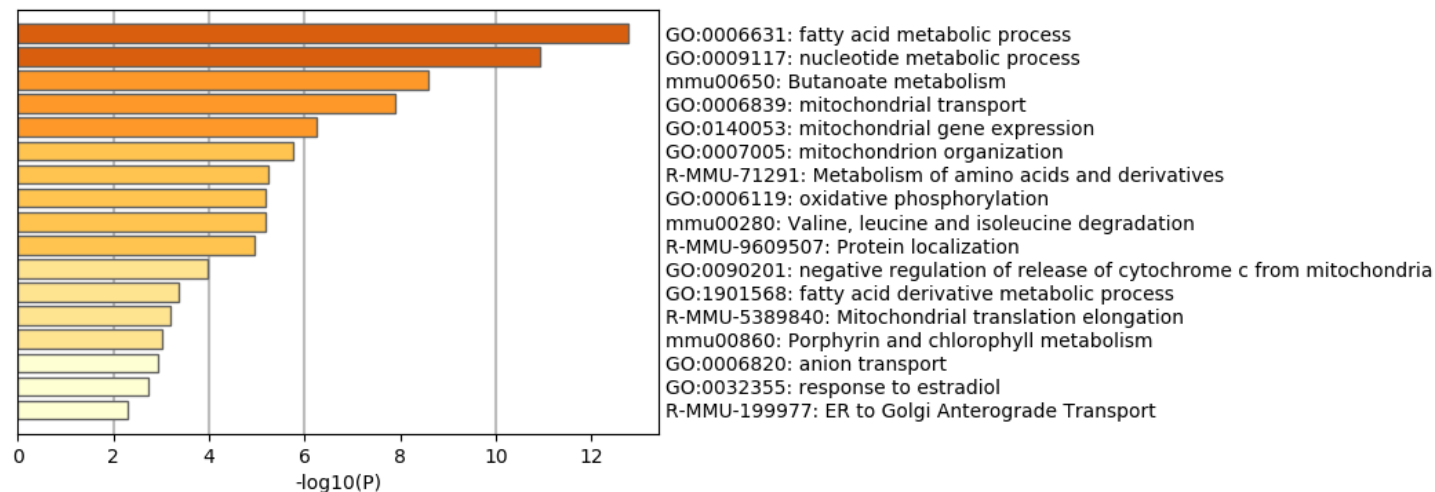

**B**

Acadl|Aldh3a2|Cpt2|Ggt1|Anxa1|Echdc2|Mlycd|Them4|Acox3|Hadha|Cyp2c50|Acsm1|Acad9|Hadhb|Acsm2|Acsf3|Acsm5|Cyp2c68

**Supplementary Figure 1. Proteomics based approach to analyze the acetylome in *Sirt3<sup>+/+</sup>* and *Sirt3<sup>-/-</sup>* mice.** Proteins with increased acetylation in *Sirt3<sup>-/-</sup>* liver tissue as compared to *Sirt3<sup>+/+</sup>* tissue were detected by mass spectrometry following immunoprecipitation with an anti-acetyllysine antibody (ICP0388; ImmunoChem Pharmaceuticals, Inc.). (A) Pathway analysis was performed using Metascape. Bar graph of enriched terms across input protein list, colored by p-values is shown. (B) List of proteins with increased acetylation in *Sirt3<sup>-/-</sup>* liver tissue as compared to *Sirt3<sup>+/+</sup>* tissue included in the Fatty acid metabolic process cluster is shown.
